# Supplementary material
Source: publisher figshare collection journal article supplement (https://future-science-group.figshare.com/ndownloader/files/34016681)
Supplement: Supplementary file 1 [file 34016681]

## SUPPLEMENTARY TABLES

**Supplementary table 1.** Patient socio-demographic and clinical characteristics at baseline in the subpopulations treated with medium-to-high fentanyl doses ( $\geq 200$   $\mu\text{g}$ ) for BTcP.

| Characteristic                                         | Fentanyl 200 $\mu\text{g}$<br>(n = 8) <sup>a</sup> | Fentanyl 267 $\mu\text{g}$<br>(n = 9) <sup>b</sup> | Fentanyl 400 $\mu\text{g}$<br>(n = 14) <sup>c</sup> | Fentanyl 533 $\mu\text{g}$<br>(n = 1) <sup>d</sup> |
|--------------------------------------------------------|----------------------------------------------------|----------------------------------------------------|-----------------------------------------------------|----------------------------------------------------|
| <b>Age, mean (SD)</b>                                  | 64.2 (17.1)                                        | 74.5 (12.8)                                        | 58.9 (14.3)                                         | 62.1                                               |
| <b>Age classification, n (%)</b>                       |                                                    |                                                    |                                                     |                                                    |
| <60 years                                              | 3 (37.5)                                           | 2 (22.2)                                           | 6 (42.9)                                            | 0                                                  |
| 60-80 years                                            | 4 (50.0)                                           | 4 (44.4)                                           | 7 (50.0)                                            | 1 (100.0)                                          |
| >80 years                                              | 1 (12.5)                                           | 3 (33.3)                                           | 1 (7.1)                                             | 0                                                  |
| <b>Men, n (%)</b>                                      | 3 (37.5)                                           | 5 (55.6)                                           | 9 (64.3)                                            | 1 (100.0)                                          |
| <b>Type of patient, n (%)</b>                          |                                                    |                                                    |                                                     |                                                    |
| Outpatient                                             | 8 (100.0)                                          | 6 (66.7)                                           | 13 (92.9)                                           | 1 (100.0)                                          |
| Hospitalized                                           | 0                                                  | 3 (33.3)                                           | 1 (7.1)                                             | 0                                                  |
| <b>Clinical data, n (%)</b>                            |                                                    |                                                    |                                                     |                                                    |
| Cachexia                                               | 4 (50.0)                                           | 0 (0)                                              | 5 (35.7)                                            | 1 (100.0)                                          |
| Xerostomia                                             | 6 (75.0)                                           | 3 (33.3)                                           | 8 (57.1)                                            | 1 (100.0)                                          |
| Addictive behaviour                                    | 0                                                  | 0                                                  | 1 (7.1)                                             | 0                                                  |
| <b>Comorbidities<sup>e</sup>, n (%)</b>                |                                                    |                                                    |                                                     |                                                    |
| COPD                                                   | 0                                                  | 1 (11.1)                                           | 0                                                   | 0                                                  |
| Diabetes mellitus                                      | 3 (37.5)                                           | 3 (33.3)                                           | 4 (28.6)                                            | 1 (100.0)                                          |
| Chronic heart failure                                  | 2 (25.0)                                           | 3 (33.3)                                           | 2 (14.3)                                            | 0                                                  |
| Chronic liver disease                                  | 2 (25.0)                                           | 0                                                  | 3 (21.4)                                            | 1 (100.0)                                          |
| Other chronic conditions                               | 7 (87.5)                                           | 4 (44.4)                                           | 5 (35.7)                                            | 1 (100.0)                                          |
| <b>Charlson Index, mean (SD)</b>                       | 8.6 (1.8)                                          | 6.4 (2.6)                                          | 6.9 (2.6)                                           | 10                                                 |
| <b>Tumour type<sup>e</sup>, n (%)</b>                  |                                                    |                                                    |                                                     |                                                    |
| Pancreatic                                             | 0                                                  | 0                                                  | 2 (14.3)                                            | 0                                                  |
| Lung                                                   | 1 (12.5)                                           | 0                                                  | 1 (7.1)                                             | 1 (100.0)                                          |
| Breast                                                 | 2 (25.0)                                           | 1 (11.1)                                           | 1 (7.1)                                             | 0                                                  |
| Gastric                                                | 1 (12.5)                                           | 2 (22.2)                                           | 3 (21.4)                                            | 0                                                  |
| Prostatic                                              | 0                                                  | 0                                                  | 3 (21.4)                                            | 0                                                  |
| Others                                                 | 4 (50.0)                                           | 6 (66.7)                                           | 4 (28.6)                                            | 0                                                  |
| <b>Stage, n (%)</b>                                    |                                                    |                                                    |                                                     |                                                    |
| III                                                    | 0                                                  | 3 (33.3)                                           | 0                                                   | 0                                                  |
| IV                                                     | 8 (100.0)                                          | 6 (66.7)                                           | 14 (100.0)                                          | 1 (100.0)                                          |
| <b>ECOG-PS, n (%)</b>                                  |                                                    |                                                    |                                                     |                                                    |
| 0                                                      | 0                                                  | 1 (11.1)                                           | 0                                                   | 0                                                  |
| 1                                                      | 3 (37.5)                                           | 5 (55.5)                                           | 4 (28.6)                                            | 0                                                  |
| 2                                                      | 4 (50.0)                                           | 2 (22.2)                                           | 8 (57.1)                                            | 1 (100.0)                                          |
| 3                                                      | 1 (12.5)                                           | 1 (11.1)                                           | 2 (14.3)                                            | 0                                                  |
| <b>Site of metastasis<sup>e</sup>, n (%)</b>           |                                                    |                                                    |                                                     |                                                    |
| Lung                                                   | 3 (37.5)                                           | 3 (33.3)                                           | 3 (21.4)                                            | 1 (100.0)                                          |
| Liver                                                  | 3 (37.5)                                           | 2 (22.2)                                           | 4 (28.6)                                            | 1 (100.0)                                          |
| Bone                                                   | 3 (37.5)                                           | 2 (22.2)                                           | 9 (64.3)                                            | 1 (100.0)                                          |
| Lymphatic nodes                                        | 4 (50.0)                                           | 3 (33.3)                                           | 2 (14.3)                                            | 1 (100.0)                                          |
| Others                                                 | 4 (50.0)                                           | 0                                                  | 3 (21.4)                                            | 1 (100.0)                                          |
| <b>Cognitive status, n (%)</b>                         |                                                    |                                                    |                                                     |                                                    |
| No cognitive impairment                                | 8 (100.0)                                          | 9 (100.0)                                          | 14 (100.0)                                          | 1 (100.0)                                          |
| Mild cognitive impairment<br>(Pfeiffer test $\leq 4$ ) | 0                                                  | 0                                                  | 0                                                   | 0                                                  |
| <b>Falls over the previous month, mean (SD)</b>        | 0                                                  | 0.2 (0.7)                                          | 0                                                   | 0                                                  |

<sup>a</sup>Patients who received  $\geq 1$  dose of 200  $\mu\text{g}$  transmucosal fentanyl during the study period. <sup>b</sup>Patients who received  $\geq 1$  dose of 267  $\mu\text{g}$  transmucosal fentanyl during the study period. <sup>c</sup>Patients who received  $\geq 1$  dose of 400  $\mu\text{g}$  transmucosal fentanyl during the study period. <sup>d</sup>Patients who received  $\geq 1$  dose of 533  $\mu\text{g}$

transmucosal fentanyl during the study period. <sup>e</sup>Only the most frequent tumour types and sites of metastasis are shown. Patients may present more than one site of metastasis.

BTcP, breakthrough cancer pain; COPD, chronic obstructive pulmonary disease; ECOG-PS, Eastern Cooperative Oncology Group Performance Status.

**Supplementary table 2.** Clinical features of background pain and BTcP at baseline in the subpopulations treated with medium-to-high fentanyl doses ( $\geq 200$   $\mu\text{g}$ ) for BTcP.

|                                                      | Fentanyl 200 $\mu\text{g}$<br>(n = 8) <sup>a</sup> | Fentanyl 267 $\mu\text{g}$<br>(n = 9) <sup>b</sup> | Fentanyl 400 $\mu\text{g}$<br>(n = 14) <sup>c</sup> | Fentanyl 533 $\mu\text{g}$<br>(n = 1) <sup>d</sup> |
|------------------------------------------------------|----------------------------------------------------|----------------------------------------------------|-----------------------------------------------------|----------------------------------------------------|
| <b>Background pain</b>                               |                                                    |                                                    |                                                     |                                                    |
| <b>Treatment, n (%)</b>                              |                                                    |                                                    |                                                     |                                                    |
| Transdermal fentanyl                                 | 6 (75.0)                                           | 4 (44.4)                                           | 8 (57.1)                                            | 1 (100.0)                                          |
| Morphine                                             | 0                                                  | 1 (11.1)                                           | 2 (14.3)                                            | 0                                                  |
| Oxycodone/naloxone                                   | 0                                                  | 2 (22.2)                                           | 2 (14.3)                                            | 0                                                  |
| Oxycodone                                            | 1 (12.5)                                           | 2 (22.2)                                           | 2 (14.3)                                            | 0                                                  |
| <b>Characteristics, mean (SD)</b>                    |                                                    |                                                    |                                                     |                                                    |
| VAS                                                  | 4.9 (1.9)                                          | 5.1 (1.7)                                          | 4.1 (2.0)                                           | 7                                                  |
| <b>Breakthrough cancer pain (BTcP)</b>               |                                                    |                                                    |                                                     |                                                    |
| <b>Type, n (%)</b>                                   |                                                    |                                                    |                                                     |                                                    |
| Mixed                                                | 4 (50.0)                                           | 4 (44.4)                                           | 9 (64.3)                                            | 0                                                  |
| Neuropathic                                          | 0                                                  | 0                                                  | 0                                                   | 0                                                  |
| Visceral nociceptive                                 | 2 (25.0)                                           | 2 (22.2)                                           | 2 (14.3)                                            | 0                                                  |
| Somatic nociceptive                                  | 2 (25.0)                                           | 3 (33.3)                                           | 3 (21.4)                                            | 1 (100.0)                                          |
| <b>Triggering factor, n (%)</b>                      |                                                    |                                                    |                                                     |                                                    |
| Spontaneous or idiopathic                            | 4 (50.0)                                           | 4 (44.4)                                           | 7 (50.0)                                            | 1 (100.0)                                          |
| Incident                                             | 4 (50.0)                                           | 5 (55.6)                                           | 7 (50.0)                                            | 0                                                  |
| Volitional                                           | 2 (25.0)                                           | 0                                                  | 3 (21.4)                                            | 0                                                  |
| Non volitional                                       | 1 (12.5)                                           | 2 (22.2)                                           | 1 (7.1)                                             | 0                                                  |
| Procedural                                           | 1 (12.5)                                           | 3 (33.3)                                           | 3 (21.4)                                            | 0                                                  |
| <b>Location<sup>e</sup>, n (%)</b>                   |                                                    |                                                    |                                                     |                                                    |
| Abdominal                                            | 2 (25.0)                                           | 3 (33.3)                                           | 6 (42.9)                                            | 0                                                  |
| Thoracic                                             | 2 (25.0)                                           | 1 (11.1)                                           | 2 (14.3)                                            | 1 (100.0)                                          |
| Lumbar                                               | 0                                                  | 2 (22.2)                                           | 2 (14.3)                                            | 0                                                  |
| Upper / lower limbs                                  | 0                                                  | 0                                                  | 1 (7.1)                                             | 0                                                  |
| Neck                                                 | 0                                                  | 1 (11.1)                                           | 0                                                   | 0                                                  |
| Dorsal                                               | 0                                                  | 2 (22.2)                                           | 3 (21.4)                                            | 0                                                  |
| Others                                               | 4 (50.0)                                           | 3 (33.3)                                           | 3 (21.4)                                            | 0                                                  |
| <b>Characteristics, mean (SD)</b>                    |                                                    |                                                    |                                                     |                                                    |
| VAS                                                  | 8.0 (1.4)                                          | 8.1 (0.9)                                          | 8.2 (1.3)                                           | 8                                                  |
| No. episodes in the last 24h                         | 4.5 (1.9)                                          | 2.8 (1.3)                                          | 3.3 (1.9)                                           | 5                                                  |
| Duration of BTcP episodes (min)                      | 18.5 (11.6)                                        | 25.6 (15.3)                                        | 20.4 (12.0)                                         | 10                                                 |
| <b>Pharmacological treatment at enrolment, n (%)</b> |                                                    |                                                    |                                                     |                                                    |
| Fentanyl                                             | 7 (87.5)                                           | 9 (100.0)                                          | 14 (100.0)                                          | 1 (100.0)                                          |
| Morphine                                             | 7 (87.5)                                           | 9 (100.0)                                          | 14 (100.0)                                          | 1 (100.0)                                          |
|                                                      | 0                                                  | 0 (0.0)                                            | 0 (0.0)                                             | 0                                                  |
| <b>Adjuvant non-drug treatment, n (%)</b>            |                                                    |                                                    |                                                     |                                                    |
|                                                      | 1 (12.5)                                           | 0                                                  | 3 (21.4)                                            | 0                                                  |
| <b>Adjuvant analgesia<sup>e</sup>, n (%)</b>         |                                                    |                                                    |                                                     |                                                    |
| Corticoids                                           | 1 (12.5)                                           | 5 (55.6)                                           | 9 (64.3)                                            | 0                                                  |
| Anticonvulsants                                      | 1 (12.5)                                           | 3 (33.3)                                           | 6 (42.9)                                            | 0                                                  |
| Antidepressants                                      | 2 (25.0)                                           | 1 (11.1)                                           | 3 (21.4)                                            | 0                                                  |
| Benzodiazepines                                      | 2 (25.0)                                           | 3 (33.3)                                           | 2 (14.3)                                            | 1 (100.0)                                          |
| Others                                               | 0                                                  | 1 (11.1)                                           | 1 (7.1)                                             | 0                                                  |

<sup>a</sup>Patients who received  $\geq 1$  dose of 200  $\mu\text{g}$  transmucosal fentanyl during the study period. <sup>b</sup>Patients who received  $\geq 1$  dose of 267  $\mu\text{g}$  transmucosal fentanyl during the study period. <sup>c</sup>Patients who received  $\geq 1$  dose of 400  $\mu\text{g}$  transmucosal fentanyl during the study period. <sup>d</sup>Patients who received  $\geq 1$  dose of 533  $\mu\text{g}$  transmucosal fentanyl during the study period. <sup>e</sup>Only the most frequent locations of pain and adjuvant analgesia are shown. Patients may have received more than one adjuvant drug.

BTcP, breakthrough cancer pain; VAS, visual analogue scale.

**Supplementary table 3.** Evolution of background pain and BTcP over the study period in the subpopulations treated with medium-to-high fentanyl doses ( $\geq 200$   $\mu\text{g}$ ) for BTcP.

|                                                   | V0        | V8          | V15         | V28         | V90         |
|---------------------------------------------------|-----------|-------------|-------------|-------------|-------------|
| <b>Patients, n</b>                                |           |             |             |             |             |
| Fentanyl 200 $\mu\text{g}^a$                      | 8         | 8           | 8           | 8           | 7           |
| Fentanyl 267 $\mu\text{g}^b$                      | 9         | 9           | 9           | 9           | 8           |
| Fentanyl 400 $\mu\text{g}^c$                      | 14        | 14          | 14          | 13          | 13          |
| Fentanyl 533 $\mu\text{g}^d$                      | 1         | 1           | 1           | 1           | 1           |
| <b>Background pain</b>                            |           |             |             |             |             |
| <b>VAS<sup>e</sup>, mean (SD)</b>                 |           |             |             |             |             |
| Fentanyl 200 $\mu\text{g}^a$                      | 4.9 (1.9) | 4.0 (2.3)   | 3.3 (1.8)   | 3.4 (2.1)   | 2.4 (1.4)   |
| Fentanyl 267 $\mu\text{g}^b$                      | 5.1 (1.7) | 3.9 (2.5)   | 1.9 (0.8)   | 1.3 (0.9)   | 1.4 (0.7)   |
| Fentanyl 400 $\mu\text{g}^c$                      | 4.1 (2.0) | 3.4 (2.4)   | 3.1 (1.7)   | 3.0 (1.6)   | 2.4 (0.9)   |
| Fentanyl 533 $\mu\text{g}^d$                      | 7         | 5           | 3           | 5           | 4           |
| <b>Changes in therapy, n (%)</b>                  |           |             |             |             |             |
| Fentanyl 200 $\mu\text{g}^a$                      | -         | 5 (62.5)    | 3 (37.5)    | 4 (50.0)    | 3 (37.5)    |
| Fentanyl 267 $\mu\text{g}^b$                      | -         | 5 (55.6)    | 2 (22.2)    | 0 (0.0)     | 0 (0.0)     |
| Fentanyl 400 $\mu\text{g}^c$                      | -         | 7 (50.0)    | 7 (50.0)    | 5 (35.7)    | 1 (7.1)     |
| Fentanyl 533 $\mu\text{g}^d$                      | -         | 1 (100.0)   | 0 (0.0)     | 1 (100.0)   | 0 (0.0)     |
| <b>Breakthrough cancer pain</b>                   |           |             |             |             |             |
| <b>VAS<sup>e</sup>, mean (SD)</b>                 |           |             |             |             |             |
| Fentanyl 200 $\mu\text{g}^a$                      | 8.0 (1.4) | 6.4 (3.0)   | 5.8 (2.8)   | 5.3 (2.2)   | 4.9 (2.7)   |
| Fentanyl 267 $\mu\text{g}^b$                      | 8.1 (0.9) | 6.4 (1.2)   | 4.7 (1.1)   | 4.2 (1.2)   | 3.8 (0.7)   |
| Fentanyl 400 $\mu\text{g}^c$                      | 8.2 (1.3) | 6.9 (1.5)   | 6.1 (1.7)   | 5.6 (1.9)   | 5.0 (1.6)   |
| Fentanyl 533 $\mu\text{g}^d$                      | 8         | 8           | 6           | 5           | 5           |
| <b>No. episodes in the last 24h, mean (SD)</b>    |           |             |             |             |             |
| Fentanyl 200 $\mu\text{g}^a$                      | 4.5 (1.9) | 2.8 (2.1)   | 3.0 (2.0)   | 2.0 (1.2)   | 1.9 (1.9)   |
| Fentanyl 267 $\mu\text{g}^b$                      | 2.8 (1.3) | 2.8 (0.4)   | 1.8 (0.8)   | 1.1 (0.9)   | 1.2 (1.0)   |
| Fentanyl 400 $\mu\text{g}^c$                      | 3.3 (1.9) | 2.8 (1.4)   | 3.0 (1.3)   | 2.5 (1.1)   | 1.9 (1.0)   |
| Fentanyl 533 $\mu\text{g}^d$                      | 5         | 5           | 4           | 3           | 3           |
| <b>Duration of BTcP episodes (min), mean (SD)</b> |           |             |             |             |             |
| Fentanyl 200 $\mu\text{g}^a$                      | -         | 21.9 (18.7) | 35.6 (39.0) | 23.8 (9.9)  | 21.4 (14.1) |
| Fentanyl 267 $\mu\text{g}^b$                      | -         | 23.9 (12.2) | 18.9 (8.2)  | 15.0 (6.1)  | 18.4 (9.2)  |
| Fentanyl 400 $\mu\text{g}^c$                      | -         | 15.3 (8.4)  | 16.5 (11.1) | 18.6 (12.4) | 13.8 (11.2) |
| Fentanyl 533 $\mu\text{g}^d$                      | -         | 20          | 20          | 35          | 35          |
| <b>Time to pain relief (min), mean (SD)</b>       |           |             |             |             |             |
| Fentanyl 200 $\mu\text{g}^a$                      | -         | 10.0 (5.3)  | 8.5 (4.7)   | 11.5 (3.5)  | 10.0 (5.8)  |
| Fentanyl 267 $\mu\text{g}^b$                      | -         | 12.8 (3.6)  | 8.7 (3.2)   | 7.8 (2.6)   | 8.3 (3.8)   |
| Fentanyl 400 $\mu\text{g}^c$                      | -         | 7.9 (4.8)   | 9.9 (7.1)   | 9.8 (5.6)   | 9.2 (6.2)   |
| Fentanyl 533 $\mu\text{g}^d$                      | -         | 15          | 10          | 15          | 15          |
| <b>Changes in therapy, n (%)</b>                  |           |             |             |             |             |
| Fentanyl 200 $\mu\text{g}^a$                      | -         | 5 (62.5)    | 3 (37.5)    | 1 (12.5)    | 2 (25.0)    |
| Fentanyl 267 $\mu\text{g}^b$                      | -         | 5 (55.6)    | 6 (66.7)    | 1 (11.1)    | 0 (0.0)     |
| Fentanyl 400 $\mu\text{g}^c$                      | -         | 6 (42.9)    | 4 (28.6)    | 4 (28.6)    | 2 (15.4)    |
| Fentanyl 533 $\mu\text{g}^d$                      | -         | 1 (100.0)   | 1 (100.0)   | 1 (100.0)   | 1 (100.0)   |

Data collected on baseline visit (V0) and subsequent visits on day 8 (V8), 15 (V15), 28 (V28) and 90 (V90) are shown. <sup>a</sup>Patients who received  $\geq 1$  dose of 200  $\mu\text{g}$  transmucosal fentanyl during the study period.

<sup>b</sup>Patients who received  $\geq 1$  dose of 267  $\mu\text{g}$  transmucosal fentanyl during the study period. <sup>c</sup>Patients who received  $\geq 1$  dose of 400  $\mu\text{g}$  transmucosal fentanyl during the study period. <sup>d</sup>Patients who received  $\geq 1$  dose of 533  $\mu\text{g}$  transmucosal fentanyl during the study period. <sup>e</sup>Fentanyl 200  $\mu\text{g}$  subgroup: statistically significant differences were observed between baseline and subsequent visits for both background pain and BTcP, except for background pain V0 vs. V8 ( $p = 0.244$ ) and V0 vs. V28 ( $p = 0.072$ ). Fentanyl 267  $\mu\text{g}$  subgroup: statistically significant differences were observed between baseline and subsequent visits for both background pain and BTcP, except for V0 vs. V8 for background pain ( $p = 0.216$ ).  $P$  value was  $<0.001$  in all comparisons for BTcP excepting V0 vs. V8 ( $p = 0.008$ ). Fentanyl 400  $\mu\text{g}$  subgroup:

statistically significant differences were observed between V0 vs. V15 and V0 vs. V90 for background pain, and in all comparisons for BTcP.

BTcP, breakthrough cancer pain; VAS, visual analogue scale.

**Supplementary table 4.** Quality of life outcomes according to the EORTC QLQ-C30 in the subpopulations treated with medium-to-high fentanyl doses ( $\geq 200$   $\mu\text{g}$ ) for BTcP.

|                             | Fentanyl 200 $\mu\text{g}$ (n = 8) <sup>a</sup> |                |         | Fentanyl 267 $\mu\text{g}$ (n = 9) <sup>b</sup> |                |         | Fentanyl 400 $\mu\text{g}$ (n = 14) <sup>c</sup> |                 |         | Fentanyl 533 $\mu\text{g}$ (n = 1) <sup>d</sup> |                |
|-----------------------------|-------------------------------------------------|----------------|---------|-------------------------------------------------|----------------|---------|--------------------------------------------------|-----------------|---------|-------------------------------------------------|----------------|
| Scale, mean (SD)            | V0<br>(n = 8)                                   | V28<br>(n = 8) | p value | V0<br>(n = 9)                                   | V28<br>(n = 9) | p value | V0<br>(n = 14)                                   | V28<br>(n = 13) | p value | V0<br>(n = 1)                                   | V28<br>(n = 1) |
| <b>Global health status</b> | 37.5 (18.9)                                     | 43.8 (25.5)    | 0.445   | 38.9 (26.4)                                     | 61.1 (24.79)   | 0.106   | 33.3 (18.2)                                      | 48.1 (21.6)     | 0.027   | 25.0                                            | 16.7           |
| <b>Functional scales</b>    |                                                 |                |         |                                                 |                |         |                                                  |                 |         |                                                 |                |
| Physical                    | 64.2 (33.6)                                     | 58.3 (18.1)    | 0.541   | 63.0 (25.0)                                     | 63.0 (29.1)    | >0.999  | 70.5 (22.6)                                      | 58.5 (24.4)     | 0.180   | 13.3                                            | 40.0           |
| Role                        | 33.3 (34.5)                                     | 43.8 (30.8)    | 0.384   | 38.9 (26.4)                                     | 42.6 (22.2)    | 0.622   | 34.5 (20.1)                                      | 47.4 (27.9)     | 0.075   | 0.0                                             | 33.3           |
| Emotional                   | 42.7 (32.3)                                     | 54.2 (29.2)    | 0.333   | 50.9 (29.0)                                     | 70.4 (19.6)    | 0.006   | 33.3 (27.5)                                      | 47.4 (25.1)     | 0.031   | 50.0                                            | 41.0           |
| Cognitive                   | 54.2 (26.4)                                     | 64.6 (24.3)    | 0.278   | 61.6 (26.4)                                     | 77.8 (23.6)    | 0.017   | 59.5 (16.9)                                      | 65.4 (24.0)     | 0.190   | 66.7                                            | 50.0           |
| Social                      | 29.2 (26.4)                                     | 52.1 (16.5)    | 0.022   | 51.9 (22.7)                                     | 55.6 (36.3)    | 0.782   | 39.3 (25.0)                                      | 48.7 (25.0)     | 0.201   | 16.7                                            | 33.3           |
| <b>Symptom scales</b>       |                                                 |                |         |                                                 |                |         |                                                  |                 |         |                                                 |                |
| Fatigue                     | 68.1 (24.1)                                     | 55.6 (22.2)    | 0.168   | 48.1 (26.6)                                     | 48.1 (18.4)    | >0.999  | 61.1 (21.7)                                      | 49.6 (20.1)     | 0.041   | 88.9                                            | 66.7           |
| Pain                        | 79.2 (19.4)                                     | 47.9 (20.8)    | 0.003   | 68.5 (25.6)                                     | 37.0 (7.3)     | 0.002   | 71.4 (29.5)                                      | 57.7 (25.1)     | 0.057   | 83.3                                            | 66.7           |
| Nausea and vomiting         | 25.0 (26.7)                                     | 16.7 (29.5)    | 0.445   | 3.7 (7.3)                                       | 1.9 (5.6)      | 0.594   | 9.5 (14.2)                                       | 2.6 (6.3)       | 0.137   | 16.7                                            | 16.7           |
| Dyspnea                     | 12.5 (17.3)                                     | 12.5 (17.3)    | >0.999  | 7.4 (14.7)                                      | 7.4 (14.7)     | >0.999  | 19.0 (21.5)                                      | 7.7 (14.6)      | 0.054   | 33.3                                            | 33.3           |
| Insomnia                    | 45.8 (39.6)                                     | 25.0 (23.6)    | 0.012   | 40.7 (40.1)                                     | 11.1 (16.7)    | 0.035   | 59.5 (32.5)                                      | 25.6 (24.2)     | 0.001   | 33.3                                            | 33.3           |
| Appetite loss               | 45.8 (35.4)                                     | 33.3 (30.9)    | 0.320   | 40.7 (27.8)                                     | 14.8 (17.6)    | 0.008   | 40.5 (14.2)                                      | 25.6 (20.0)     | 0.053   | 33.3                                            | 33.3           |
| Constipation                | 16.7 (25.2)                                     | 37.5 (27.8)    | 0.068   | 22.2 (16.7)                                     | 22.2 (16.7)    | -       | 47.6 (31.3)                                      | 46.2 (21.7)     | 0.436   | 33.3                                            | 33.3           |
| Diarrhea                    | 0                                               | 4.2 (11.8)     | 0.316   | 0                                               | 0              | -       | 0                                                | 2.6 (9.2)       | 0.337   | 0.0                                             | 0.0            |
| Financial difficulties      | 45.8 (39.6)                                     | 41.7 (34.5)    | 0.757   | 29.6 (26.1)                                     | 37.0 (30.9)    | 0.512   | 45.2 (24.8)                                      | 35.9 (31.8)     | 0.175   | 66.7                                            | 33.3           |

<sup>a</sup>Patients who received  $\geq 1$  dose of 200  $\mu\text{g}$  transmucosal fentanyl during the study period. <sup>b</sup>Patients who received  $\geq 1$  dose of 267  $\mu\text{g}$  transmucosal fentanyl during the study period. <sup>c</sup>Patients who received  $\geq 1$  dose of 400  $\mu\text{g}$  transmucosal fentanyl during the study period. <sup>d</sup>Patients who received  $\geq 1$  dose of 533  $\mu\text{g}$  transmucosal fentanyl during the study period.

BTcP, breakthrough cancer pain; EORTC QLQ-C30, European Organization for Research and Treatment of Cancer Quality of Life Questionnaire Core 30 items; V0, baseline visit; V28, visit on day 28.

**Supplementary table 5.** Global impression of improvement according to patient's (PGI-I) and physician's (CGI-I) perspective in the subpopulations treated with medium-to-high fentanyl doses ( $\geq 200$   $\mu\text{g}$ ) for BTcP.

| N, %             | Fentanyl 200 $\mu\text{g}$<br>(n = 8) <sup>a</sup> | Fentanyl 267 $\mu\text{g}$<br>(n = 9) <sup>b</sup> | Fentanyl 400 $\mu\text{g}$<br>(n = 13) <sup>c</sup> | Fentanyl 533 $\mu\text{g}$<br>(n = 1) <sup>d</sup> |
|------------------|----------------------------------------------------|----------------------------------------------------|-----------------------------------------------------|----------------------------------------------------|
| <b>Patient</b>   |                                                    |                                                    |                                                     |                                                    |
| Very much better | 0                                                  | 2 (22.2)                                           | 0                                                   | 0                                                  |
| Much better      | 2 (25.0)                                           | 3 (33.3)                                           | 5 (38.5)                                            | 0                                                  |
| A little better  | 4 (50.0)                                           | 2 (22.2)                                           | 4 (30.8)                                            | 0                                                  |
| No change        | 0                                                  | 0                                                  | 0                                                   | 0                                                  |
| A little worse   | 0                                                  | 1 (11.1)                                           | 0                                                   | 0                                                  |
| Much worse       | 2 (25.0)                                           | 1 (11.1)                                           | 4 (30.8)                                            | 1 (100.0)                                          |
| Very much worse  | 0                                                  | 0                                                  | 0                                                   | 0                                                  |
| <b>Physician</b> |                                                    |                                                    |                                                     |                                                    |
| Very much better | 0                                                  | 5 (55.6)                                           | 3 (23.1)                                            | 0                                                  |
| Much better      | 5 (62.5)                                           | 2 (22.2)                                           | 4 (30.8)                                            | 0                                                  |
| A little better  | 1 (12.5)                                           | 0                                                  | 1 (7.7)                                             | 0                                                  |
| No change        | 2 (25.0)                                           | 2 (22.2)                                           | 4 (30.8)                                            | 1 (100.0)                                          |
| A little worse   | 0                                                  | 0                                                  | 1 (7.7)                                             | 0                                                  |
| Much worse       | 0                                                  | 0                                                  | 0                                                   | 0                                                  |
| Very much worse  | 0                                                  | 0                                                  | 0                                                   | 0                                                  |

<sup>a</sup>Patients who received  $\geq 1$  dose of 200  $\mu\text{g}$  transmucosal fentanyl during the study period. <sup>b</sup>Patients who received  $\geq 1$  dose of 267  $\mu\text{g}$  transmucosal fentanyl during the study period. <sup>c</sup>Patients who received  $\geq 1$  dose of 400  $\mu\text{g}$  transmucosal fentanyl during the study period. <sup>d</sup>Patients who received  $\geq 1$  dose of 533  $\mu\text{g}$  transmucosal fentanyl during the study period.

BTcP, breakthrough cancer pain.
